# Supplementary material for: Radiomics-Based Deep Learning Prediction of Overall Survival in Non-Small-Cell Lung Cancer Using Contrast-Enhanced Computed Tomography
Source: MDPI journal article supplement (doi:10.3390/cancers14153798), 2022-08-04
Supplement: s1 [file s1]

## Supplementary Materials

# Radiomics-Based Deep Learning Prediction of Overall Survival in Non-Small Cell Lung Cancer Using Contrast-Enhanced Computed Tomography

Supplementary Table S1. Demographics of patients' clinical data (full dataset)

| Characteristics                  | CGH<br>(n=338) | SCGH<br>(n=154) | P    |
|----------------------------------|----------------|-----------------|------|
| <b>Age(y)</b>                    |                |                 | 0.56 |
| Mean ± SD                        | 66.98 ± 12.24  | 66.62 ± 11.84   |      |
| <b>Gender, no. (%)</b>           |                |                 | 0.75 |
| Male                             | 183 (54.14%)   | 81 (52.60%)     |      |
| Female                           | 155 (45.86%)   | 73 (47.40%)     |      |
| <b>Histology</b>                 |                |                 | 0.16 |
| Adenocarcinoma                   | 218 (64.50%)   | 111 (72.08%)    |      |
| Squamous cell carcinoma          | 73 (21.60%)    | 23 (14.94%)     |      |
| Adenosquamous carcinoma          | 11 (3.25%)     | 1 (0.65%)       |      |
| Large cell cancer                | 4 (1.18%)      | 2 (1.30%)       |      |
| Other NSCLC                      | 32 (9.47%)     | 17 (11.04%)     |      |
| <b>Laterality</b>                |                |                 | 0.28 |
| Right                            | 184 (54.44%)   | 89 (57.79%)     |      |
| Left                             | 149 (44.08%)   | 65 (42.21%)     |      |
| Both side lesion, unknown origin | 5 (1.48%)      | 0 (0.00%)       |      |
| <b>Primary Site</b>              |                |                 | 0.38 |
| Upper lobe                       | 188 (55.62%)   | 93 (60.39%)     |      |
| Middle lobe                      | 23 (6.80%)     | 11 (7.14%)      |      |
| Lower lobe                       | 109 (32.25%)   | 46 (29.87%)     |      |
| Lung                             | 15 (4.44%)     | 2 (1.30%)       |      |
| Overlapping                      | 3 (0.89%)      | 2 (1.30%)       |      |
| <b>Clinical T stage</b>          |                |                 | 0.47 |
| 0                                | 1 (0.30%)      | 0 (0.00%)       |      |
| 1                                | 40 (11.83%)    | 18 (11.69%)     |      |
| 2                                | 93 (27.51%)    | 32 (20.78%)     |      |
| 3                                | 70 (20.71%)    | 39 (25.32%)     |      |
| 4                                | 134 (39.64%)   | 65 (42.21%)     |      |
| <b>Clinical N stage</b>          |                |                 | 0.59 |
| 0                                | 108 (31.95%)   | 54 (35.06%)     |      |
| 1                                | 27 (7.99%)     | 11 (7.14%)      |      |
| 2                                | 85 (24.85%)    | 44 (28.57%)     |      |
| 3                                | 118 (34.91%)   | 45 (29.22%)     |      |
| <b>Clinical M stage</b>          |                |                 | 0.07 |
| 0                                | 110 (32.54%)   | 63 (40.91%)     |      |
| 1                                | 228 (67.46%)   | 91 (59.09%)     |      |
| <b>Clinical stage</b>            |                |                 | 0.16 |
| I                                | 48 (14.20%)    | 23 (14.94%)     |      |
| II                               | 12 (3.55%)     | 11 (7.14%)      |      |

|                             |              |              |           |
|-----------------------------|--------------|--------------|-----------|
| III                         | 50 (14.79%)  | 29 (18.83%)  | 0.68      |
| IV                          | 228 (67.46%) | 91 (59.09%)  |           |
| <b>Pathological T stage</b> |              |              |           |
| 0                           | 3 (0.89%)    | 2 (1.30%)    |           |
| 1                           | 30 (8.88%)   | 13 (8.44%)   |           |
| 2                           | 42 (12.43%)  | 17 (11.04%)  |           |
| 3                           | 9 (2.66%)    | 6 (3.90%)    | 0.01*     |
| 4                           | 3 (0.89%)    | 4 (2.60%)    |           |
| Not available               | 251 (74.26%) | 112 (72.73%) |           |
| <b>Pathological N stage</b> |              |              |           |
| 0                           | 54 (15.98%)  | 23 (14.94%)  |           |
| 1                           | 3 (0.89%)    | 6 (3.90%)    |           |
| 2                           | 20 (5.92%)   | 7 (4.55%)    | 0.01*     |
| 3                           | 16 (4.73%)   | 0 (0.00%)    |           |
| Not available               | 245 (72.49%) | 118 (76.62%) |           |
| <b>Pathological M stage</b> |              |              |           |
| 0                           | 0 (0.00%)    | 0 (0.00%)    |           |
| 1                           | 63 (18.64%)  | 15 (9.74%)   | 1.52E-05* |
| Not available               | 275 (81.36%) | 139 (90.26%) |           |
| <b>Pathological stage</b>   |              |              |           |
| 1                           | 42 (12.43%)  | 22 (14.29%)  |           |
| 2                           | 9 (2.66%)    | 9 (5.84%)    |           |
| 3                           | 23 (6.80%)   | 30 (19.48%)  |           |
| 4                           | 81 (23.96%)  | 91 (59.09%)  | 0.66      |
| Not available               | 183 (54.14%) | 2 (1.30%)    |           |
| <b>Surgery</b>              |              |              |           |
| None                        | 250 (73.96%) | 111 (72.08%) | 0.06      |
| Yes                         | 88 (26.04%)  | 43 (27.92%)  |           |
| <b>Chemotherapy</b>         |              |              |           |
| None                        | 202 (59.76%) | 78 (50.65%)  |           |
| Yes                         | 136 (40.24%) | 76 (49.35%)  | 0.02*     |
| <b>Radiation therapy</b>    |              |              |           |
| None                        | 217 (64.20%) | 115 (74.68%) |           |
| Yes                         | 121 (35.80%) | 39 (25.32%)  |           |
| <b>Systemic therapy</b>     |              |              | 0.08      |
| None                        | 112 (33.14%) | 39 (25.32%)  |           |
| Yes                         | 226 (66.86%) | 115 (74.68%) |           |
| <b>Targeted therapy</b>     |              |              | 0.36      |
| None                        | 215 (63.61%) | 104 (67.53%) |           |
| Yes                         | 123 (36.39%) | 50 (32.47%)  |           |
| <b>Smoke</b>                |              |              | 0.91      |
| None                        | 188 (55.62%) | 88 (57.14%)  |           |
| Yes                         | 138 (40.83%) | 66 (42.86%)  |           |
| Not available               | 12 (3.55%)   | 0 (0.00%)    |           |
| <b>Betel nut use</b>        |              |              | 5.25E-05* |
| None                        | 300 (88.76%) | 114 (74%)    |           |
| Yes                         | 27 (7.99%)   | 22 (14.3%)   |           |
| Not available               | 11 (3.25%)   | 18 (11.7%)   |           |
| <b>Alcohol use</b>          |              |              | 4.00E-03* |
| None                        | 240 (71.01%) | 92 (59.74%)  |           |
| Quit drinking               | 33 (9.76%)   | 18 (11.69%)  |           |
| Sometimes                   | 20 (5.92%)   | 11 (7.14%)   |           |
| Always                      | 34 (10.06%)  | 15 (9.74%)   |           |

|                                                          |               |               |           |
|----------------------------------------------------------|---------------|---------------|-----------|
| Not available                                            | 11 (3.25%)    | 18 (11.69%)   | 5.43E-15* |
| <b>Visceral Pleural Invasion</b>                         |               |               |           |
| None                                                     | 310 (91.72%)  | 97 (62.99%)   | 9.73E-15* |
| Pleural invasion                                         | 28 (8.28%)    | 57 (37.01%)   |           |
| <b>Assessment of performance status before treatment</b> |               |               |           |
| ECOG=0 ; KPS=100 °                                       | 73 (21.60%)   | 29 (18.83%)   |           |
| ECOG=1 ; KPS=80 / 90 °                                   | 9 (2.66%)     | 38 (24.68%)   |           |
| ECOG=2 ; KPS=60 / 70 °                                   | 14 (4.14%)    | 11 (7.14%)    |           |
| ECOG=3 ; KPS=40 / 50 °                                   | 5 (1.48%)     | 3 (1.95%)     | 0.15      |
| ECOG=4 ; KPS=10 / 20 / 30                                | 1 (0.29%)     | 5 (3.25%)     |           |
| Not available                                            | 236 (69.82%)  | 68 (44.16%)   |           |
| <b>Malignant Pleural Effusion</b>                        |               |               |           |
| None                                                     | 121 (35.80%)  | 60 (38.96%)   |           |
| MPE diagnosed by physicians and images, without cytology | 91 (26.92%)   | 29 (18.83%)   | 0.20      |
| Not available                                            | 126 (37.28%)  | 65 (42.21%)   |           |
| <b>Survival</b>                                          |               |               |           |
| Alive                                                    | 97 (28.70%)   | 53 (34.42%)   |           |
| Dead                                                     | 241 (71.30%)  | 101 (65.58%)  |           |
| <b>Duration (months)</b>                                 | 20.15 ± 19.95 | 12.75 ± 11.70 | 2.22E-05* |
| Median                                                   | 12            | 11            |           |

Note: p-values are results of  $\chi^2$  test for categorized variables and student's t-test for continuous variables.

NSCLC= non-small cell lung cancer, ECOG=Eastern cooperative oncology group, KPS= Karnofsky scale. \*P < 0.05

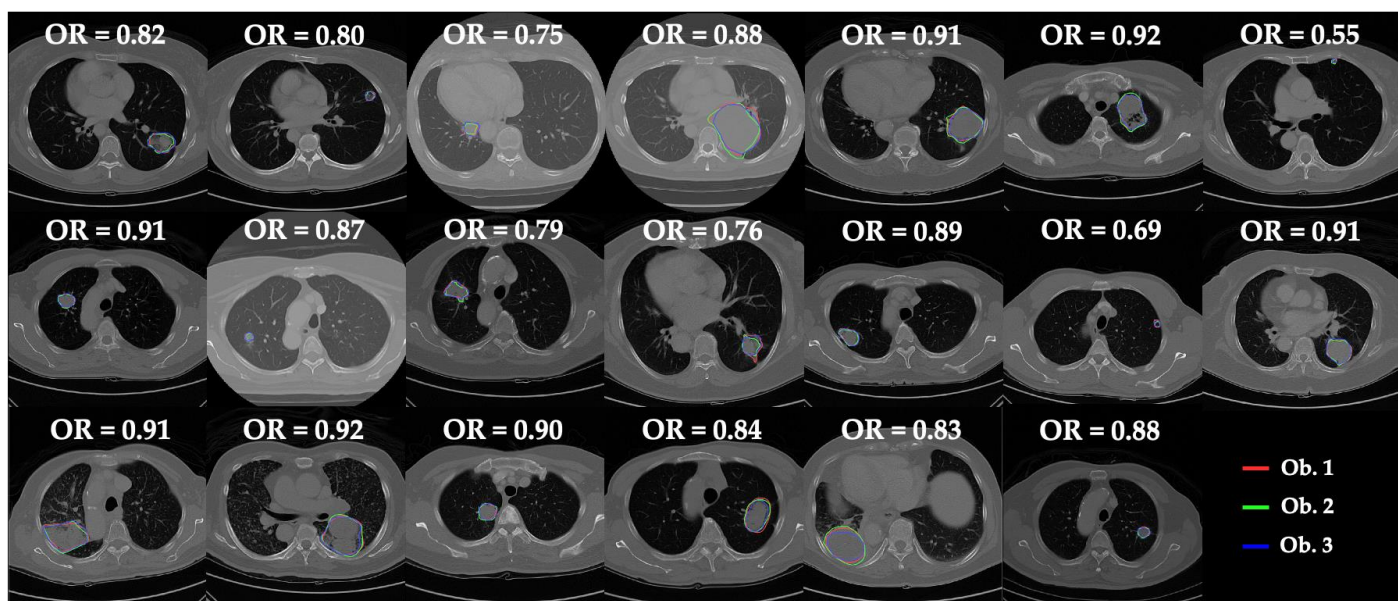

**Supplementary Figure S1.** Overlapping rate of tumor segmentation among the three observers. To assess the inter-observer variation, 20 NSCLC tumors were randomly selected and the ROIs of these tumors were delineated by the three radiologists. The red, green and blue contours indicate manual segmented tumors by three observers respectively. The ICC of overlapping rate is  $0.83 \pm 0.10$  which shows high consistency. OR: overlapping rate, Ob.: observer.

**Supplementary Table S2.** Intraclass correlation coefficient (ICC) of 19 radiomic feature categories. ICC of radiomic features were also assessed to verify feature reproducibility. Texture features with HLL wavelet filter performed lower consistency among three observers.

| Wavelet | Categories | ICC   |                    |
|---------|------------|-------|--------------------|
|         |            | Mean  | Standard deviation |
| Primary | Histogram  | 0.897 | 0.085              |
| Primary | Geometry   | 0.885 | 0.104              |
| Primary | Texture    | 0.855 | 0.125              |
| LLL     | Histogram  | 0.916 | 0.062              |
| LLL     | Texture    | 0.889 | 0.089              |
| LLH     | Histogram  | 0.935 | 0.143              |
| LLH     | Texture    | 0.893 | 0.122              |
| LHL     | Histogram  | 0.917 | 0.095              |
| LHL     | Texture    | 0.869 | 0.132              |
| LHH     | Histogram  | 0.940 | 0.085              |
| LHH     | Texture    | 0.901 | 0.105              |
| HLL     | Histogram  | 0.940 | 0.107              |
| HLL     | Texture    | 0.819 | 0.244              |
| HLH     | Histogram  | 0.966 | 0.069              |
| HLH     | Texture    | 0.868 | 0.161              |
| HHL     | Histogram  | 0.881 | 0.179              |
| HHL     | Texture    | 0.868 | 0.146              |
| HHH     | Histogram  | 0.934 | 0.105              |
| HHH     | Texture    | 0.897 | 0.101              |

**Supplementary Table S3.** Comparisons between patients with and without targeted therapy.

| Characteristics                  | Non-Targeted<br>therapy<br>(n=319) | Targeted<br>therapy<br>(n=173) | P values               |
|----------------------------------|------------------------------------|--------------------------------|------------------------|
| <b>Histology</b>                 |                                    |                                | 1.79×10 <sup>-14</sup> |
| Adenocarcinoma                   | 174                                | 155                            |                        |
| Squamous cell carcinoma          | 93                                 | 3                              |                        |
| Adenosquamous carcinoma          | 10                                 | 2                              |                        |
| Large cell cancer                | 6                                  | 0                              |                        |
| Other NSCLC                      | 36                                 | 13                             |                        |
| <b>Clinical T stage</b>          |                                    |                                | 2.34×10 <sup>-04</sup> |
| 0                                | 1                                  | 0                              |                        |
| 1                                | 50                                 | 8                              |                        |
| 2                                | 89                                 | 36                             |                        |
| 3                                | 59                                 | 50                             |                        |
| 4                                | 120                                | 79                             |                        |
| <b>Clinical N stage</b>          |                                    |                                | 2.18×10 <sup>-03</sup> |
| 0                                | 124                                | 38                             |                        |
| 1                                | 23                                 | 15                             |                        |
| 2                                | 75                                 | 54                             |                        |
| 3                                | 97                                 | 66                             |                        |
| <b>Clinical stage</b>            |                                    |                                | 2.29×10 <sup>-20</sup> |
| I                                | 71                                 | 0                              |                        |
| II                               | 23                                 | 0                              |                        |
| III                              | 66                                 | 13                             |                        |
| IV                               | 159                                | 160                            |                        |
| <b>Surgery</b>                   |                                    |                                | 3.43×10 <sup>-13</sup> |
| None                             | 200                                | 161                            |                        |
| Yes                              | 119                                | 12                             |                        |
| <b>EGFR mutation</b>             |                                    |                                | 1.76×10 <sup>-49</sup> |
| Absent                           | 79                                 | 32                             |                        |
| Present                          | 25                                 | 122                            |                        |
| Not available                    | 215                                | 19                             |                        |
| <b>Overall survival (months)</b> | 16.93 ± 17.55                      | 19.51 ± 19.01                  | 0.13                   |
